# Supplementary material
Source: publisher figshare collection journal article supplement (https://acs.figshare.com/ndownloader/files/3765274)

# **Quantitative Host Cell Protein Analysis using Two Dimensional Data Independent LC-MS<sup>E</sup>**

**Amy Farrell<sup>1,3</sup>, Stefan Mittermayr<sup>1</sup>, Brian Morrissey<sup>1</sup>, Niaobh M<sup>c</sup>Loughlin<sup>1</sup>,  
Natalia Navas Iglesias<sup>2</sup>, Ian W. Marison<sup>3</sup> and Jonathan Bones<sup>1\*</sup>**

<sup>1</sup>Characterisation and Comparability Laboratory, NIBRT – The National Institute for Bioprocessing Research and Training, Foster Avenue, Mount Merrion, Blackrock, Co. Dublin, Ireland.

<sup>2</sup>Department of Analytical Chemistry, University of Granada, Avenue Fuentenueva S/N, 18071 Granada, Spain.

<sup>3</sup>School of Biotechnology, Dublin City University, Glasnevin, Dublin 9, Ireland.

\*Corresponding author: Email: jonathan.bones@nibrt.ie, Tel: +353 1215 8105, Fax: +353 1215 8116.

*Supplementary Information*

**Table of Contents:**

| <b>Description</b>                                                                                                                                                                                                                                                                                                                                                                      | <b>Page</b> |
|-----------------------------------------------------------------------------------------------------------------------------------------------------------------------------------------------------------------------------------------------------------------------------------------------------------------------------------------------------------------------------------------|-------------|
| <b>Supplementary Table 1:</b> P-value result for each Hi3 standard peptide calculated from peak height of the peptide ion peak in extracted ion chromatograms from three separate experiments, each containing 20 2D-LC-MS <sup>E</sup> samples. Peptide sequence, average molecular weight and typical m/z value are also outlined.                                                    | S-3         |
| <b>Supplementary Figure 1:</b> Extracted ion chromatogram showing five Hi3 standards used for Hi3 quantitation of HCPs identified in purified mAb samples.                                                                                                                                                                                                                              | S-3         |
| <b>Supplementary Table 2:</b> Summary of identified HCPs and related concentrations in combined sample sets processed from Protein A resin with different elution buffers.                                                                                                                                                                                                              | S-4         |
| <b>Supplementary Table 3:</b> Whole protein immunogenicity score reported by the CHOPPI web tool for assessment of immunogenicity risk from HCPs in CHO-based protein production. Proteins with an immunogenicity score of > 20 are considered to be a high risk for immunogenicity, while proteins with a score < -20 are reportedly immunologically inert.                            | S-6         |
| <b>Supplementary Table 4:</b> Analytical results from charge variant and size exclusion analysis of intact mAb1.                                                                                                                                                                                                                                                                        | S-7         |
| <b>Supplementary Figure 2:</b> Chromatographic profiles obtained from (A) charge variant analysis and (B) SEC, both shown in expanded scale, for mAb1 samples purified from Protein A resin using acetate-, arginine-, citrate- and glycine-based buffers. Reference Table 2 for numerical values obtained from these analyses.                                                         | S-7         |
| <b>Supplementary Figure 3:</b> Overlay of chromatograms displaying N-glycan profiles of mAb1 processed from Protein A resin using elution buffers 100 mM sodium acetate, pH 3.5, 100 mM arginine, pH 3.5, 100 mM citrate, pH 3.5 and 100 mM glycine, pH 3.5.                                                                                                                            | S-8         |
| <b>Supplementary Figure 4:</b> Annotation of 2AB-labelled mAb1 N-glycan profiles following exoglycosidase digestion. The top profile (1) shows undigested pool of N-glycan, followed by a series of exoglycosidase digestions with (2) <i>Arthrobacter ureafaciens</i> sialidase, ABS, (3) ABS and Bovine testis galactosidase, BTG and (4) ABS, BTG and Bovine kidney fucosidase, BKF. | S-9         |
| <b>Supplementary Figure 5:</b> Graphic of anti-Interleukin 8 IgG1 (mAb1) structure. MAb1 peptides, which were identified in sample fractions also containing Calreticulin peptides, are highlighted in the heavy chain (blue) and light chain (green) portions of the structure.                                                                                                        | S-10        |

**Supplementary Table 1:** P-value result for each Hi3 standard peptide calculated from peak height of the peptide ion peak in extracted ion chromatograms from three separate experiments, each containing 20 2D-LC-MS<sup>E</sup> samples. Peptide sequence, average molecular weight and typical m/z value are also outlined.

| Hi3 Standard Peptide Sequence | Average Molecular Weight | m/z    | P-value |
|-------------------------------|--------------------------|--------|---------|
| NNPVLIGEPGVGK                 | 1293.4863                | 647.38 | 0.13770 |
| LPQVEGTGGDVQPSQDLVR           | 1995.1776                | 998.54 | 0.12817 |
| VIGQNEAVDAVSNAIR              | 1655.8292                | 828.47 | 0.07979 |
| VTDAEIAEVLAR                  | 1286.4484                | 643.88 | 0.55885 |
| AIDLIDEAASSIR                 | 1373.5266                | 687.39 | 0.14309 |

**Supplementary Figure 1:** Extracted ion chromatogram showing five Hi3 standards used for Hi3 quantitation of HCPs identified in purified mAb samples.

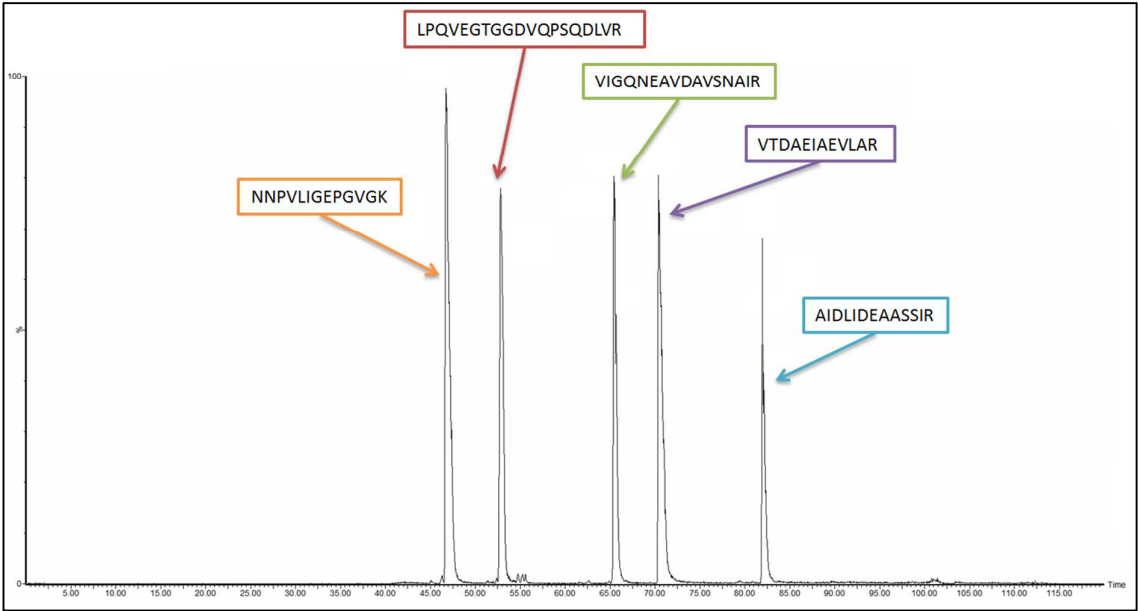

**Supplementary Table 2:** Summary of identified HCPs and related concentrations in combined sample sets processed from Protein A resin with different elution buffers.

| List of HCPs identified with >2 unique peptides |                                           | Concentration of HCP in combined sample sets (ppm - ng/mg) |                 |                |                | PLGS protein score Range | Protein average mass (kDa) | Protein Sequence Coverage Range (%) | Number of Peptides Identified |
|-------------------------------------------------|-------------------------------------------|------------------------------------------------------------|-----------------|----------------|----------------|--------------------------|----------------------------|-------------------------------------|-------------------------------|
| Protein Entry                                   | Protein Description                       | 100 mM Acetate                                             | 100 mM Arginine | 100 mM Citrate | 100 mM Glycine |                          |                            |                                     |                               |
| CH10                                            | 10 kDa heat shock protein mitochondrial   | ND                                                         | ND              | ND             | *              | 542.0                    | 11.032                     | 23.53                               | 2                             |
| RL20                                            | 60S ribosomal protein L30                 | ND                                                         | 44.1            | *              | ND             | 780.6 - 2090.1           | 12.955                     | 20.80 - 26.09                       | 2 – 3                         |
| GRP78                                           | 78 kDa glucose-regulated protein          | 73.7                                                       | 126.3           | 205.6          | ND             | 419.3 - 503.4            | 72.550                     | 11.93 - 14.53                       | 7 – 12                        |
| ACTC                                            | Actin alpha cardiac muscle 1              | *                                                          | ND              | ND             | ND             | 307.7                    | 42.361                     | 14.59                               | 2                             |
| ACTB                                            | Actin cytoplasmic 1                       | *                                                          | ND              | ND             | 113.7          | 470.9 - 569.6            | 42.080                     | 20.27 - 36.27                       | 2 – 11                        |
| ACTG                                            | Actin cytoplasmic 2                       | 19.5                                                       | ND              | ND             | ND             | 627.4                    | 33.391                     | 17.69                               | 7                             |
| ANXA2                                           | Annexin A2                                | *                                                          | ND              | ND             | 232.6          | 396.4 - 771.0            | 38.946                     | 9.73 - 25.37                        | 2 – 5                         |
| ANXA5                                           | Annexin A5                                | 95.1                                                       | ND              | ND             | *              | 346.7 - 536.4            | 36.122                     | 10.28 - 19.31                       | 2 – 6                         |
| SLPI                                            | Antileukoproteinase                       | 1088.3                                                     | 819.4           | 3727.5         | 4528.7         | 2531.1 - 21214.76        | 16.745                     | 30.56 - 59.72                       | 4 – 10                        |
| ACTBL                                           | Beta-actin-like protein 2                 | 153.0                                                      | ND              | ND             | ND             | 257.1                    | 37.484                     | 15.57                               | 5                             |
| CALR                                            | Calreticulin                              | 208.1                                                      | ND              | 360.8          | 380.5          | 819.7 - 1882.2           | 48.414                     | 30.46 - 37.41                       | 8 – 13                        |
| CATB                                            | Cathepsin B                               | 99.4                                                       | ND              | *              | 261.1          | 479.2 - 2732.9           | 38.417                     | 10.03 - 40.12                       | 2 – 8                         |
| CATD                                            | Cathepsin D                               | ND                                                         | ND              | ND             | 951.6          | 285.7                    | 44.567                     | 7.60                                | 8                             |
| CCL2                                            | C-C motif chemokine 2                     | ND                                                         | *               | *              | ND             | 635.6 - 703.7            | 16.201                     | 5.59                                | 2                             |
| CLUS                                            | Clusterin                                 | 445.9                                                      | ND              | ND             | ND             | 535                      | 52.385                     | 20.58                               | 12                            |
| CXCL3                                           | C-X-C motif chemokine 3                   | 72.7                                                       | ND              | ND             | *              | 2258.0 - 3765.8          | 11.264                     | 40.59                               | 2 - 5                         |
| DLDH                                            | Dihydrolipoyl dehydrogenase mitochondrial | *                                                          | ND              | ND             | ND             | 342.5                    | 54.702                     | 5.89                                | 2                             |
| FIBB                                            | Fibrinogen beta chain                     | *                                                          | ND              | ND             | ND             | 335.0                    | 54.893                     | 3.55                                | 2                             |
| G3PT                                            | Glyceraldehyde-3-phosphate dehydrogenase  | *                                                          | ND              | ND             | ND             | 407.4                    | 35.976                     | 6.91                                | 2                             |

|                                                  |                                              |               |               |               |                |                  |         |               |        |
|--------------------------------------------------|----------------------------------------------|---------------|---------------|---------------|----------------|------------------|---------|---------------|--------|
| <b>H12</b>                                       | Histone H1.2                                 | ND            | ND            | ND            | 82             | 1212.3           | 21.285  | 17.92         | 5      |
| <b>H13</b>                                       | Histone H1.3                                 | *             | ND            | ND            | ND             | 1196.2           | 20.512  | 17.87         | 2      |
| <b>H2B1F</b>                                     | Histone H2B type 1-F/J/L                     | ND            | ND            | *             | ND             | 2297.5           | 11.158  | 27.45         | 2      |
| <b>H3</b>                                        | Histone H3                                   | ND            | ND            | *             | ND             | 951.4            | 24.371  | 11.93         | 2      |
| <b>H4</b>                                        | Histone H4                                   | ND            | ND            | *             | 86.3           | 782.6 - 1301.0   | 8.983   | 24.69 - 37.04 | 2 – 3  |
| <b>MFGM</b>                                      | Lactadherin                                  | ND            | 207.1         | 419.6         | ND             | 2639.8 - 3598.1  | 48.284  | 43.56 - 52.22 | 9 – 15 |
| <b>MMP19</b>                                     | Matrix metalloproteinase-19                  | *             | ND            | 210.0         | 449.8          | 462.7 - 584.3    | 59.170  | 12.57 - 20.38 | 2 – 8  |
| <b>TIMP2</b>                                     | Metalloproteinase inhibitor 2                | 358.7         | 298.0         | 346.9         | 1583.4         | 507.5 - 2285.2   | 27.486  | 17.62 - 52.46 | 6 – 9  |
| <b>PHOCN</b>                                     | MOB-like protein phocein isoform X2          | 627.4         | ND            | ND            | *              | 540.8 - 2205.8   | 32.759  | 20.28 - 25.17 | 2 – 8  |
| <b>NELFE</b>                                     | Negative elongation factor E                 | ND            | ND            | *             | ND             | 755.8            | 42.788  | 26.26         | 2      |
| <b>NID1</b>                                      | Nidogen-1                                    | 3357.9        | *             | ND            | 2516           | 308.9 - 744.5    | 135.143 | 14.19 - 25.91 | 2 – 26 |
| <b>YBOX1</b>                                     | Nuclease-sensitive element-binding protein 1 | 318.6         | ND            | ND            | ND             | 565.7            | 32.776  | 31.03         | 8      |
| <b>PPIB</b>                                      | Peptidyl-prolyl cis-trans isomerase B        | ND            | *             | 85.3          | ND             | 619.8 - 1464.6   | 23.692  | 21.76 - 22.22 | 2 – 6  |
| <b>PRDX1</b>                                     | Peroxiredoxin-1                              | *             | ND            | ND            | *              | 210.0 - 653.6    | 22.548  | 9.17 - 16.08  | 2      |
| <b>PCOC1</b>                                     | Procollagen C-endopeptidase enhancer         | 98.8          | ND            | ND            | 1210           | 222.8 - 1109.1   | 51.131  | 16.45 - 33.55 | 7 – 11 |
| <b>PRC2B</b>                                     | Proline-rich protein 2-like                  | 1940.1        | ND            | *             | ND             | 1310.9 - 1512.2  | 52.585  | 62.63 - 63.93 | 2 - 52 |
| <b>BROMI</b>                                     | Protein Broad minded isoform X3              | ND            | *             | ND            | *              | 374.5 - 415.7    | 146.423 | 4.77 - 5.16   | 2      |
| <b>S10A6</b>                                     | Protein S100-A6                              | 1.4           | ND            | ND            | ND             | 1187.4           | 10.108  | 61.80         | 6      |
| <b>PLBL2</b>                                     | Putative phospholipase B-like 2              | *             | ND            | ND            | ND             | 313.2            | 65.940  | 9.40          | 2      |
| <b>RCN1</b>                                      | Reticulocalbin-1                             | *             | ND            | ND            | ND             | 741.6            | 19.539  | 55.76         | 2      |
| <b>HTRA1</b>                                     | Serine Protease HTRA1                        | 247.6         | 781.0         | 1247.9        | 2119.5         | 592.1.2 - 1530.7 | 48.697  | 24.94 - 38.98 | 7 - 13 |
| <b>Total concentration (ppm - ng HCP/mg IgG)</b> |                                              | <b>9206.2</b> | <b>2275.9</b> | <b>6603.6</b> | <b>14515.2</b> |                  |         |               |        |

HCPs identified using a minimum of 2 peptides are denoted by the symbol ‘\*’, while undetected HCPs are represented by ‘ND’.

**Supplementary Table 3:** Whole protein immunogenicity score reported by the CHOPPI web tool for assessment of immunogenicity risk from HCPs in CHO-based protein production. Proteins with an immunogenicity score of > 20 are considered to be a high risk for immunogenicity, while proteins with a score < -20 are reportedly immunologically inert.

| Protein Entry | Protein Description                          | Immunogenicity score reported by CHOPPI |
|---------------|----------------------------------------------|-----------------------------------------|
| YBOX1         | Nuclease-sensitive element-binding protein 1 | -65.86                                  |
| RCN1          | Reticulocalbin-1                             | -57.94                                  |
| PRDX1         | Peroxiredoxin-1                              | -51.76                                  |
| GRP78         | 78 kDa glucose-regulated protein             | -48.51                                  |
| G3PT          | Glyceraldehyde-3-phosphate dehydrogenase     | -39.89                                  |
| H13           | Histone H1.3                                 | -39.18                                  |
| CALR          | Calreticulin                                 | -37.79                                  |
| ACTB          | Actin cytoplasmic 1                          | -34.19                                  |
| CATB          | Cathepsin B                                  | -32.6                                   |
| NID1          | Nidogen-1                                    | -32.42                                  |
| ACTC          | Actin alpha cardiac muscle 1                 | -32.34                                  |
| H12           | Histone H1.2                                 | -28.81                                  |
| PCOC1         | Procollagen C-endopeptidase enhancer         | -28.49                                  |
| ACTBL         | Beta-actin-like protein 2                    | -26.78                                  |
| TIMP2         | Metalloproteinase inhibitor 2                | -25.28                                  |
| FIBB          | Fibrinogen beta chain                        | -24.24                                  |
| DLDH          | Dihydrolipoyl dehydrogenase mitochondrial    | -22.06                                  |
| PPIB          | Peptidyl-prolyl cis-trans isomerase B        | -13.65                                  |
| HTRA1         | Serine Protease HTRA1                        | -13.02                                  |
| CATD          | Cathepsin D                                  | -11.36                                  |
| ACTG          | Actin cytoplasmic 2                          | -9.36                                   |
| MFGM          | Lactadherin                                  | -9.16                                   |
| CH10          | 10 kDa heat shock protein mitochondrial      | -7.1                                    |
| CLUS          | Clusterin                                    | -3.55                                   |
| MMP19         | Matrix metalloproteinase-19                  | -2.49                                   |
| SLPI          | Antileukoproteinase                          | 0.01                                    |
| PHOCN         | MOB-like protein phocein isoform X2          | 4.44                                    |
| H2B1F         | Histone H2B type 1-F/J/L                     | 6.77                                    |
| H4            | Histone H4                                   | 7.67                                    |
| NELFE         | Negative elongation factor E                 | 10.59                                   |
| ANXA2         | Annexin A2                                   | 14.87                                   |
| CCL2          | C-C motif chemokine 2                        | 18.31                                   |
| H3            | Histone H3                                   | 25.79                                   |
| PLBL2         | Putative phospholipase B-like 2              | 32.89                                   |
| S1046         | Protein S100-A6                              | 52.84                                   |
| ANXA5         | Annexin A5                                   | 52.91                                   |
| RL20          | 60S ribosomal protein L30                    | 57.41                                   |
| CXCL3         | C-X-C motif chemokine 3                      | 91.84                                   |

**Supplementary Table 4:** Analytical results from charge variant and size exclusion analysis of intact mAb1.

| Buffer under evaluation      | Charge variant analysis |              |                  | Size exclusion analysis |              |              |
|------------------------------|-------------------------|--------------|------------------|-------------------------|--------------|--------------|
|                              | % acidic variants       | % main       | % basic variants | % aggregates            | % monomer    | % fragment   |
| 100 mM sodium acetate, pH3.5 | 2.75 ± 0.23             | 87.61 ± 0.14 | 9.64 ± 0.94      | 0.10 ± 0.94             | 99.87 ± 0.12 | 0.03 ± 10.57 |
| 100 mM arginine, pH3.5       | 2.14 ± 1.64             | 88.72 ± 0.14 | 9.14 ± 0.59      | 0.10 ± 3.08             | 99.87 ± 0.06 | 0.03 ± 15.59 |
| 100 mM citrate, pH3.5        | 3.43 ± 1.36             | 87.21 ± 0.21 | 9.37 ± 0.26      | 0.19 ± 0.95             | 99.76 ± 0.10 | 0.05 ± 13.74 |
| 100 mM glycine, pH3.5        | 1.94 ± 2.15             | 88.76 ± 0.22 | 9.30 ± 0.57      | 0.12 ± 3.24             | 99.84 ± 0.05 | 0.04 ± 3.49  |

**Supplementary Figure 2:** Chromatographic profiles obtained from (A) charge variant analysis and (B) SEC, both shown in expanded scale, for mAb1 samples purified from Protein A resin using acetate-, arginine-, citrate- and glycine-based buffers. Reference Table 2 for numerical values obtained from these analyses.

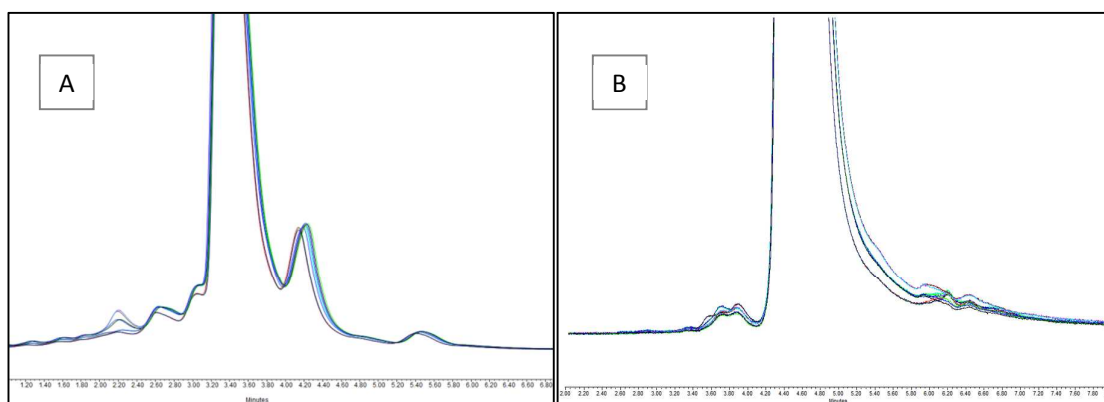

**Supplementary Figure 3:** Overlay of chromatograms displaying *N*-glycan profiles of mAb1 processed from Protein A resin using elution buffers 100 mM sodium acetate, pH 3.5, 100 mM arginine, pH 3.5, 100 mM citrate, pH 3.5 and 100 mM glycine, pH 3.5.

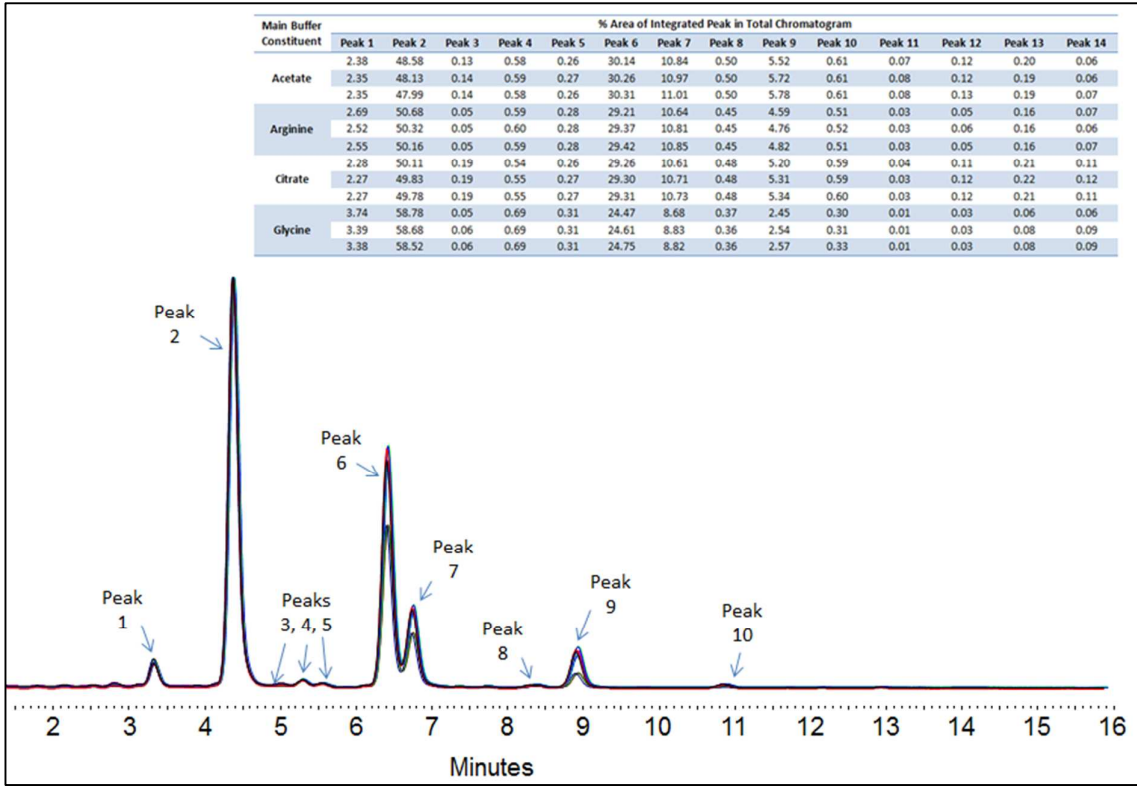



**Supplementary Figure 4:** Annotation of 2AB-labelled mAb1 *N*-glycan profiles following exoglycosidase digestion. The top profile (1) shows undigested pool of *N*-glycan, followed by a series of exoglycosidase digestions with (2) *Arthrobacter ureafaciens* sialidase, ABS, (3) ABS and Bovine testis galactosidase, BTG and (4) ABS, BTG and Bovine kidney fucosidase, BKF.

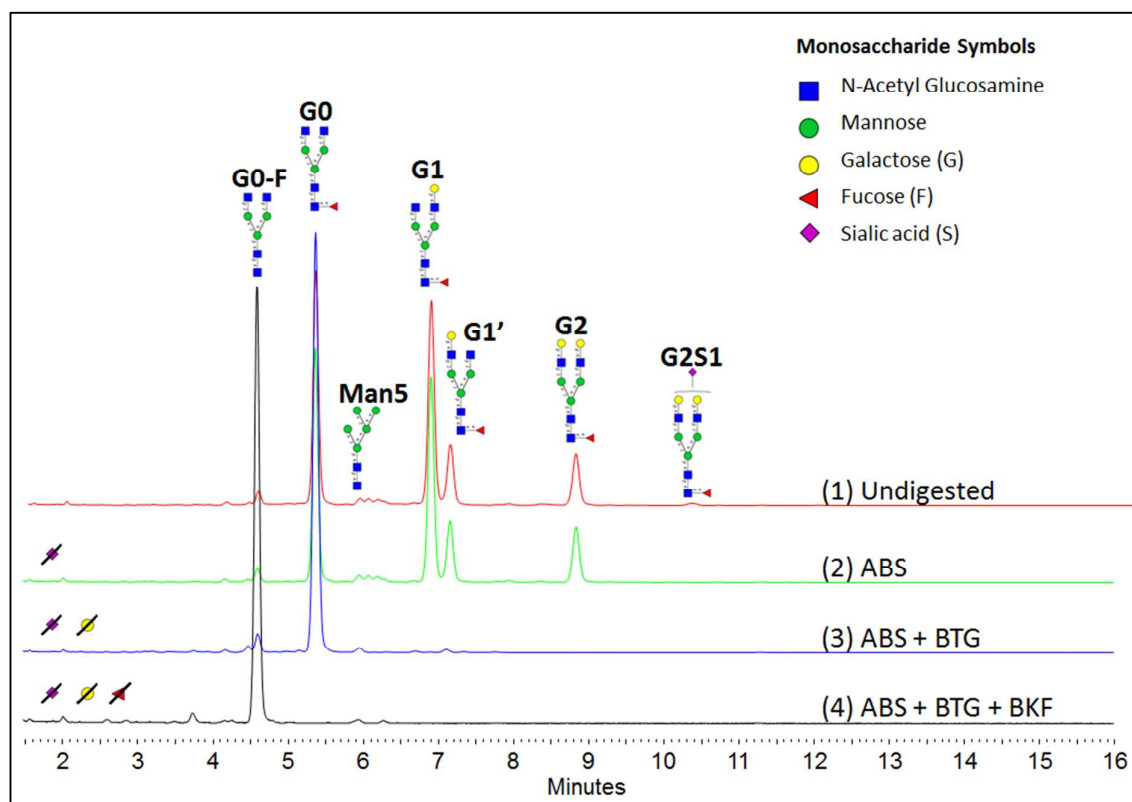

**Supplementary Figure 5:** Graphic of anti-Interleukin 8 IgG1 (mAb1) structure. MAb1 peptides, which were identified in sample fractions also containing Calreticulin peptides, are highlighted in the heavy chain (blue) and light chain (green) portions of the structure.

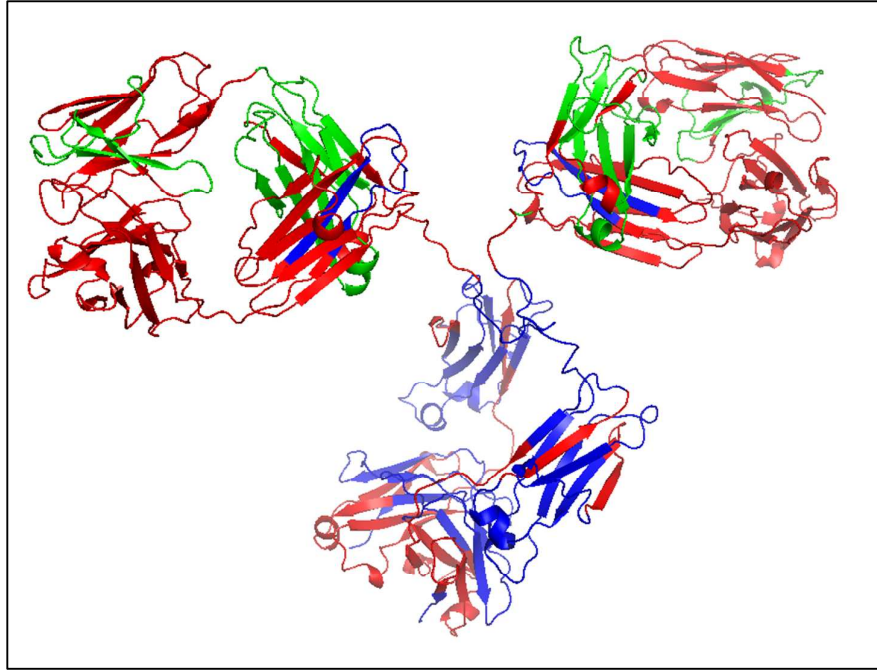

Supplement: Supplementary file 1 [file 3765274]
